# Supplementary material for: Arrangement of Annexin A2 tetramer and its impact on the structure and diffusivity of supported lipid bilayers
Source: Royal Society of Chemistry journal article supplement (doi:10.1039/c0sm00047g), 2010-01-01
Supplement: c0sm00047g.pdf [file c0sm00047g.pdf]

**Supplementary Material to:  
Conformation of Annexin II tetramer and its  
impact on the structure and diffusivity of  
supported lipid bilayers**

Kirstin Fritz <sup>a</sup>, Georg Fritz <sup>b</sup>, Barbara Windschiegl <sup>c</sup>,  
Claudia Steinem <sup>c</sup>, and Bert Nickel <sup>a,\*</sup>

<sup>a</sup>*Department für Physik und CeNS, Ludwig-Maximilians-Universität, München,  
Germany*

<sup>b</sup>*Arnold Sommerfeld Center for Theoretical Physics,  
Ludwig-Maximilians-Universität, München, Germany*

<sup>c</sup>*Institut für Organische und Biomolekulare Chemie, Georg August Universität,  
Göttingen, Germany*

<sup>\*</sup>*Corresponding author, Email address: nickel@lmu.de*

---

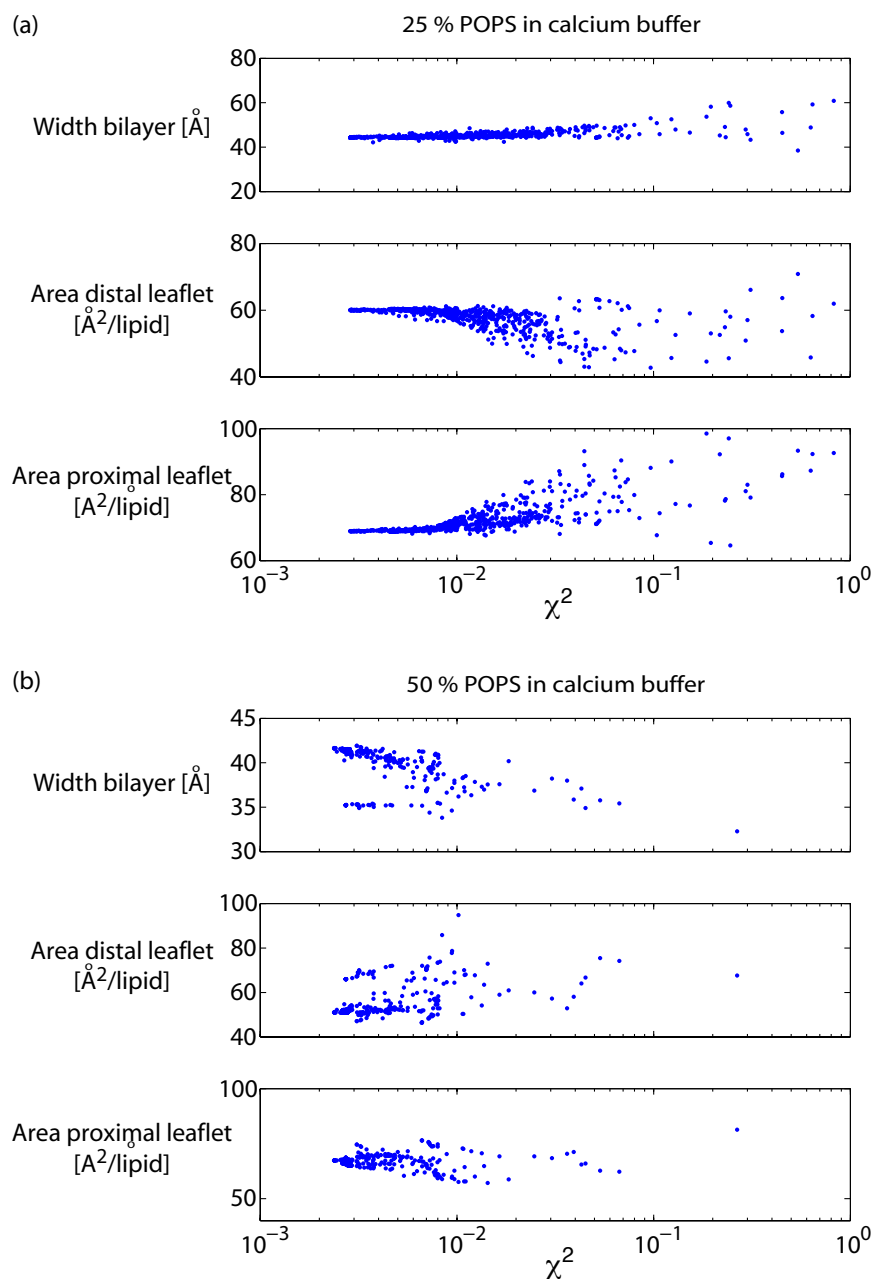

Fig. S1. Correlations between the goodness of fit and the estimated parameters in calcium containing buffer. The points correspond to local optima in the parameter space, for which the difference between the decomposition of the electron density profiles and the actual profiles in Figs. 3 is minimized. As the fit quality increases (lower  $\chi^2$ ), the parameters are confined to narrow intervals, indicating that their values are well constrained by the fitting procedure.

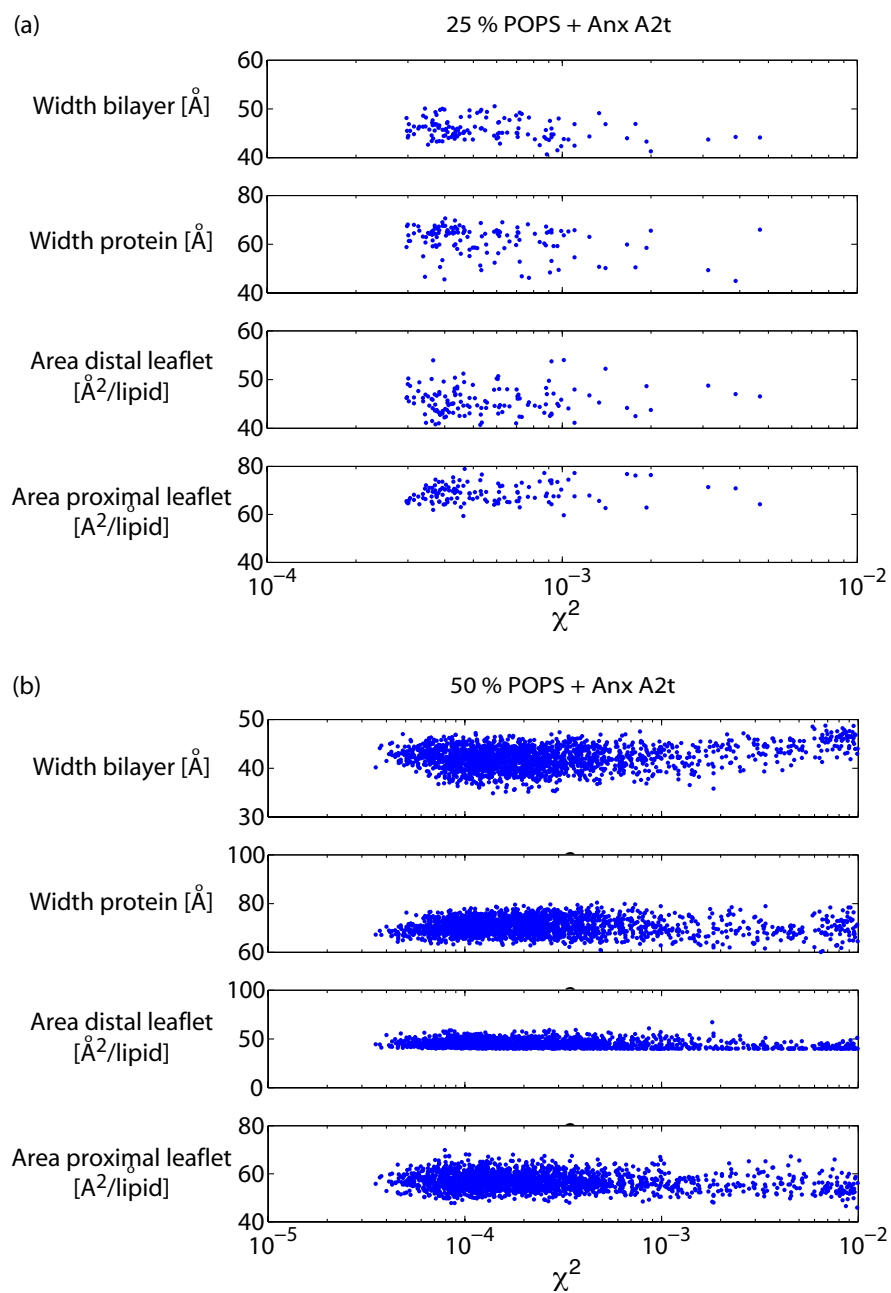

Fig. S2. Correlations between the goodness of fit and the estimated parameters after Anx A2t incubation.
